# Supplementary material
Source: publisher site journal article supplement (https://jhr.pensoft.net/article/11255/download/suppl/31/)
Supplement: Supplementary file 1

1 **Subgeneric classification and biology of the leafcutter and**  
2 **dauber bees (genus *Megachile* Latreille) of the western**  
3 **Paleartic (Hymenoptera, Apoidea, Megachilidae)**

4

5 Christophe Praz, Journal of Hymenoptera Research, 2017

6

7 **Supplementary Material I**

8

9 **Additional notes on the new synonymies**

10

11 Spinola (1808: 57) indicates that the specimens that he had previously (Spinola  
12 1806) referred to as *punctatissima* do not belong to Latreille's (or Kirby's)  
13 species ("*Megachile punctatissima* Latr. *prorsùs distincta et in Liguria nondum*  
14 *inventà*": *M. punctatissima* Latr. is certainly distinct and has not been found in  
15 Liguria) and he describes *Heriades pusilla* Spinola, 1808 for these specimens.  
16 *Heriades pusilla* was considered as a species of *Megachile* by Schletterer (1889:  
17 688), based on the examination of a presumed syntype by F. Morawitz; these  
18 presumed syntypes were in the "Helsingfors Museum" according to Schletterer  
19 (1889), an institution that I have not been able to locate (possibly the Finnish  
20 Museum of Natural History). However, it is probable that Spinola's type series  
21 was mixed ("*Variat spinulis scutellaribus nullis*": the species varies, with the  
22 scutellum sometimes without spine); specimens without spine may have been a  
23 *Megachile*. However Spinola's main description (1806, under *M. punctatissima*  
24 Latr.) excludes a species of *Megachile* ("*scutello spinulis suabus armato*":  
25 scutellum with two spines) and possibly points to an osmiine of the subgenus  
26 *Hoplosmia*. Spinola (1808: 57) also gives indications on the nesting biology of *H.*  
27 *pusilla*: the nest is placed in pithy stems of *Rubus* ("*nidum habitat cylindricum,*  
28 *simplicem, et in medulla Rubi profundè atque tortuosè fossum*") and the cell  
29 partitions are made of "worn leaves of *Rubus* assembled with some glue" ("*Muri*  
30 *interjacentes foliis Rubi efficiuntur detritis glutine quodam coadunatis*"). I do not  
31 formally transfer *H. pusilla* into *Osmia* as this would create homonymy with

32 *Osmia pusilla* Cresson. Future work, including the designation of a lectotype or a  
33 neotype is needed to settle this taxonomic issue.

34

35 The rather precise description of the male of *Heriades sinuata* Spinola, 1808  
36 suggests a species of *Heriades*: "*segmentis 4°, 5° et 6° subtùs incurvis: 6° producto,*  
37 *marginè sinuato ferè bi-emarginato*": terga 4-6 curved; T6 produced, margin  
38 sinuate and with two emarginations; "*Segmentum secundum ventrale in laminam*  
39 *productum (...), cum sexto dorsali quasi cohaerens*": S2 produced and nearly in  
40 contact with T6; "*Segmentum 7um anale, genitalia obtegens, muticum, breve,*  
41 *marginè retuso, et sub sexto valde productiore omnino reconditum*": T7 covering  
42 the genital capsule, small, short, with margin blunt, and entirely hidden under T6.  
43 The description of the female ("*Foemina ab Heriade pusilla vix discernenda*":  
44 female barely distinguishable from *H. pusilla*) may refer to either a *Heriades* or a  
45 *Hoplosmia*. I consider the name to be based on the male and thus place *H. sinuata*  
46 as a junior synonym of the common species *Heriades truncorum*.

47

48 The lectotype of *Osmia (Megachile) albohirta* Brullé, 1839 has been examined  
49 (MNHN). This specimen was likely the specimen designated as a lectotype by  
50 Lieftinck (1958); it is a male labeled as follows: 1. "Museum Paris Iles Canaries  
51 Webb Berthelot 3-41"; 2. a blue, round disc; 3. "Type"; 4. "*albo-hirta*". The  
52 specimen is in poor condition with considerable *Anthrenus* damage, but its  
53 identity is clear based on the mandible without inferior projection, the  
54 multidentate carina of tergite 6, the apical margin of tergite 7, produced and  
55 inserted into tergite 6, and the front tarsal segments 1 and 2 white, with a black  
56 maculation on the underside. All these features clearly point to the species  
57 currently known as *Megachile lanigera* Alfken, 1933, of which I studied the  
58 holotype (ETHZ) and which I place here in synonymy with *M. albohirta* (New  
59 synonymy). The type species of *Anodonteutricharaea*, *Megachile larochei* Tkalcù,  
60 1993, itself placed as a synonym of *M. lanigera* briefly after its description  
61 (Hohmann et al. 1993: 390), is also placed as a synonym of *M. albohirta* (New  
62 Synonymy).

63

64 *Megachile troodica* Mavromoustakis, 1953 was described based on several  
65 specimens collected on Mount Troodos, Cyprus. I was not able to examine the  
66 holotype female (DAAN) but a paratype female (RMNH) that perfectly agrees  
67 with the original description. Mavromoustakis (1953) pointed to the lack of  
68 continuous fringes of hairs on the sterna beneath the scopa and correctly stated  
69 "this character excludes the Cyprian new bee from the subgenus *Eutricharaea*";  
70 indeed *M. troodica* is a member of the subgenus *Anodonteutricharaea*. The  
71 holotype and several paratypes of *Megachile (Neoeutricharaea) mavromoustakisi*  
72 Zanden, 1992 have been studied (RMNH, MSCA). This species was also described  
73 from the Troodos Mountains; it fully agrees with *M. troodica* and *M.*  
74 *mavromoustakisi* is placed here in synonymy with *M. troodica* (New Synonymy).  
75

76 *Chalicodoma (Parachalicodoma) pasteelsi* Zanden, 1998, was described from a  
77 male from the Sinai (Convent Sta. Catherina, Sinai mer., 10.4.1958) and a female  
78 from "Tall el Amaran, Règ. de Mellavi, 17.3.1958" (probably Amarna,  
79 approximately 5 km S of Mallawi, Egypt], both leg. W. J. Pulawski and deposited  
80 in the collection Mavromoustakis (DAAN). I could not examine these specimens  
81 but Margarita Hadjistylli and Stuart Roberts kindly examined them and send me  
82 pictures of both specimens. According to the original description, the male  
83 should be the holotype but the female bears the holotype label; this does not  
84 reflect Zanden's intentions and the labels may have been switched after the  
85 description. I consider the male to be the holotype, as precisely indicated by  
86 Zanden (1998). As evidenced by the original description, both specimens do not  
87 belong to the same species: the male belongs to the *parietina* group of the  
88 subgenus *Chalicodoma* (T6 without lateral tooth; T7 without median spine)  
89 while the female belongs to the *incana* group of *Pseudomegachile*  
90 ("*Parachalicodoma* Pasteels, 1966") (mandible 5-toothed). Based on a picture of  
91 the male and its precise description by Stuart Roberts, who examined the  
92 specimen (pers. comm., October 2016), I consider *M. pasteelsi* as a valid species  
93 of the subgenus *Chalicodoma*. It perfectly agrees with the undescribed male of *M.*  
94 *judaea* (Tkalcù, 1999), of which I examined two paratype females (MSCA); no  
95 other species of *Chalicodoma* in this region has dense, snow white tergal fasciae,  
96 partly red legs, a smooth apical margin of S4 without premarginal groove.

97 Females of this species have been recorded from Egypt under the name *M.*  
98 *desertorum* Morawitz, 1875 (Alfken 1933a: 227): two females from Egypt  
99 identified as "*C. desertorum*" by Alfken (ZMHB) are in fact females of *M. pasteelsi*.  
100 *M. desertorum* is a Central Asian species that has so far not been recorded from  
101 Egypt (the taxon *M. desertorum* var. *atorrufa* Friese, 1898, from Egypt, refers to  
102 another species).

103

104 The type of *Megachile transitoria* Benoist, 1934, described from a single  
105 specimen from "Forêt d'Azrou" in northern Morocco, could not be located  
106 (MNHN); the original description and the subsequent description (Benoist 1935)  
107 do not refer to any known species (or subgenus) of *Megachile*, but point to an  
108 intersex specimen of the subgenus *Chalicodoma*: body length 16mm, vestiture as  
109 in *M. pyrenaica* Lepeletier, 1841, but hairs abundant on face; mandibles shorter  
110 than in *pyrenaica*, tridentate, with teeth 1 and 2 further apart than in typical  
111 females of *Chalicodoma*; apical margin of clypeus crenulate but with median  
112 tooth particularly large; scopa present. The description of the mandible, of the  
113 clypeus and of the facial vestiture points to a male, while the abdomen is likely  
114 predominantly female. Based on the vestiture color of *M. transitoria* and the  
115 occurrence of *M. parietina* (Geoffroy, 1785) in Azrou (C. Praz, unpublished), I  
116 place *M. transitoria* as a junior synonym of *M. parietina* (new synonymy). Almost  
117 contemporaneously, Alfken (1931) described two intersex specimens of *M.*  
118 *parietina* as a new species, *Chalicodoma valesina* Alfken, 1931; de Beaumont  
119 (1957) identified these specimens as intersex individuals of *M. parietina* and  
120 placed *valesina* as a junior synonym of *M. parietina*. Intersex specimens of  
121 *Megachile* usually do not have a fully developed scopa and are thus easy to  
122 identify as anomalous specimens (Fateryga et al. 2011). In the subgenus  
123 *Chalicodoma*, it seems that intersex individuals regularly develop a scopa; in  
124 addition, the lack of specialized male structures in the front legs and mandibles  
125 of the subgenus *Chalicodoma* (lack of front coxal spine and mandible without  
126 inferior projection) have likely contributed to the confusion.

127

128 The holotype of *Megachile (Metamegachile) rhodosiaca* Rebmann, 1972 (SMNS),  
129 from Rhodes, was not examined but based on comparative studies of numerous

130 specimens of both genders from Rhodos, Turkey, Israel, Iran and Egypt, this  
131 species is placed in synonymy with *Megachile doriae* Magretti, 1890, although  
132 the type material of the latter could not be located. Magretti's description of the  
133 male is rather precise and indicates that the "last metasomal segment" (in fact  
134 the sixth tergum) has its apex (in fact the preapical carina) multidentate and that  
135 its disc is covered with light pilosity and bears medially a small carina produced  
136 to a hook ("*in dorso cano tomentoso, disco in medio carinula unciformi praedito*");  
137 these features clearly point to the species of the subgenus *Creightonella* found in  
138 collections either under the name *M. doriae* or *M. rhodosiaca* (see Alfken 1935:  
139 155, Özbek and Zanden 1994: 158). The holotype of *Megachile heinrichi* (Tkalců,  
140 1979) (SMFD) has been studied and as suspected by Özbek and Zanden (1994:  
141 158), who considered it as "probably a subspecies of *Cr. rhodosiaca*", it is  
142 identical to *M. doriae* and considered here as a junior synonym of the latter.

143

144 Much confusion has remained on the identity and subgeneric affinity of  
145 *Megachile marginata* Smith, 1853, considered alternatively as a *Pseudomegachile*  
146 (Friese 1911, Ornos et al. 2007) or a *Eutricharaea* (e. g., Alfken 1933b). The  
147 holotype has been examined (OUM); it is a well-preserved female labeled as  
148 follows: 1. "*Megachile* (164.) (Albania)". 2. "*marginata* Sm. (Type) alb.". 3. Type  
149 *Megachile marginata* (= *M. picicornis* Mor. 1878) D. B. B. '77 [D. Baker 1977]".  
150 This specimen corresponds to the species that has been referred to as *Megachile*  
151 *picicornis* Morawitz, 1877 in European literature (e. g., Benoist 1940, Müller and  
152 Bansac 2004). *Stelis megachiloides* Alfken, 1942 was described on the base of two  
153 specimens from Irak; Warncke (1992: 362) considered *S. megachiloides* as a  
154 *Eutricharaea* lacking metasomal scopa. Maximilian Schwarz and Jakub Straka  
155 (pers. comm., November 2014) kindly examined the holotype (NMPC) and  
156 confirmed that it is a gynandromorph specimen of *M. marginata* (see Fateryga et  
157 al. 2011), which is also the case for the female paratype that I examined (ZMHB);  
158 *S. megachiloides* is placed here as a junior synonym of *M. marginata* (New  
159 Synonymy).

160

161 *Megachile sexmaculata* Alfken, 1942, *Megachile sexmaculata thracia* Tkalců, 1979  
162 and *Megachile (Megachile) pilicrus flavida* Zanden, 1998, are considered here as

163 junior synonyms of *M. melanogaster*. A paratype female (ZMHB) of *M.*  
164 *sexmaculata* and a paratype female of *M. sexmaculata thracia* (RMNH) have been  
165 examined, as well as the holotype of *M. pilicrus flavidus* (RMNH), confirming  
166 these synonymies. In these three taxa, the scopa is more or less white, but no  
167 sculptural difference is found between these forms and typical *melanogaster*  
168 populations, which have an entirely black scopa.

169

170 *Megachile cyrenaica* Schulthess, 1924 and *Megachile fumosa* Alfken, 1934 are  
171 newly placed in synonymy with *M. sedilloti* (New synonymies) based on the  
172 examination of the holotypes females (*M. cyrenaica*: ETHZ; *fumosa*: ZMHB). The  
173 type material of *M. fulvocrinita* could not be located; this species originating from  
174 Egypt was only described in the identification key in Alfken (1934: 159, 160)  
175 without locality data or repository details. While the description of the female is  
176 unclear, the description of the male clearly refers to *M. sedilloti* and this species  
177 is also placed in synonymy with *M. sedilloti* (New Synonymy). *M. sedilloti* has  
178 been suggested to be a synonym of *M. (Eutricharaea) leucomalla* Gerstäcker,  
179 1869 (Schwarz et al. 1996, Ornos et al. 2007) but it is a valid species closely  
180 related to *M. deceptoria*, although larger. The colour of the vestiture of *M. sedilloti*  
181 varies from white (lectotype and paralectotype of *M. sedilloti*) to black (type  
182 specimens of *fumosa* and *cyrenaica*), although this variation does not follow a  
183 geographic pattern and in some localities, both forms as well as intermediate  
184 specimens are found.

185

186 I could examine several syntypes of *Megachile soikai* Benoist, 1961 (MNHN,  
187 OLML), described from the Hoggar (Algeria). This widely distributed (Arabian  
188 Peninsula, Israel, Algeria; possibly Africa; see comments below) and well-  
189 characterized species has subsequently been described as *Megachile insignis*  
190 Zanden, 1996, of which I could examine paratypes (RMNH; MSCA). *M. insignis* is  
191 placed as a junior synonym of *M. soikai*.

192

193 The lectotype of *M. vicina* Morawitz, 1894 (ZIN) is a female from "Seravschan, Fl.  
194 Woru Kschtut, Glasunov 1892" [Tadjikistan, approximately 39°22'N/68°2'E, leg.  
195 Glasunov], designated by Zanden (1995). This specimen perfectly agrees with

196 the Central Asian populations of *M. giraudi* and it is unclear why Zanden placed it  
197 into *Pseudomegachile*. *M. giraudi* is a widely distributed species; the coloration of  
198 the vestiture is strongly variable geographically. Given that I do not see constant  
199 differences in the sculpture among these geographic forms, I consider them as  
200 belonging to one widely distributed species (the status of the closely related *M.*  
201 *altantica* Benoist, 1934 remains to be investigated).

202

203 *Megachile semipleta* Cockerell, 1921, has been described based on a single male  
204 specimen; Cockerell added "As E. Saunders remarked, it seems to be nearest to *M.*  
205 *versicolor*, Smith". I have not examined the holotype (OUMNH). However, given  
206 that *M. versicolor* has been recorded from Madeira (Fellendorf et al. 1999) and  
207 that Cockerell's minimal description points to a member of the subgenus  
208 *Megachile* and even suggests *M. versicolor* ("joints of tarsi reddish, the last bright  
209 ferruginous"), I see no compelling reason to recognize *M. semipleta* Cockerell,  
210 1921 as a distinct species.

211

212 *M. albocincta* Radoszkowski, 1874 is placed here in synonymy with *M.*  
213 *cyanipennis* Guérin-Méneville, 1845; I have not examined the type of the latter  
214 but specimens of both sexes identified by Pasteels (BMNH), who examined the  
215 type (Guiglia and Pasteels 1961); Pasteels (1965) mentions *M. cyanipennis* from  
216 Egypt and suggests that *M. albocincta* should be placed in synonymy with *M.*  
217 *cyanipennis*, which he refrained to do because he did not examine the type of *M.*  
218 *albocincta*.

219

## 220 **References**

221

- 222 Alfken JD (1931) Über das Walliser "*Chalicodoma baeticum*" (Hym. Apid.).  
223 Mitteilungen der Deutschen Entomologischen Gesellschaft 2: 18-19.
- 224 Alfken JD (1933a) Beitrag zur Kenntnis der *Chalicodoma*-Arten von Aegypten.  
225 Bulletin de la société royale entomologique d'Egypte 16: 223-230.
- 226 Alfken JD (1933b) Beitrag zur Kenntnis der Untergattung *Pseudomegachile*  
227 Friese. Konowia 12: 55-59.
- 228 Alfken JD (1934) Beitrag zur Kenntnis der *Megachile*-Arten von Aegypten.  
229 Bulletin de la Société Royale Entomologique d'Egypte 18: 146-163.
- 230 Alfken JD (1935) Beitrag zur Kenntnis der Bienenfauna von Kleinasien.  
231 Entomologische Rundschau 52: 110-111, 129-132, 148-162.

- 232 Beaumont, J de (1957) L'énigme de *Chalicodoma valesina* Alfken (Hym. Apid.).  
233 Mitteilungen der Schweizerischen Entomologischen Gesellschaft 30: 48.
- 234 Benoist R (1935) Remarques sur quelques espèces du genre *Megachile*. Annales  
235 de la société entomologique de France 104: 97-108.
- 236 Benoist R (1940) Remarques sur quelques espèces de mégachiles  
237 principalement de la faune française. Annales de la Société  
238 Entomologique de France 109: 41-88.
- 239 Fateryga AV, Ivanov SP, Filatov MA (2011) Gynandromorphs of *Megachile*  
240 *picicornis* (Morawitz, 1877) and *M. deceptor* (Peréz, 1890)  
241 (Hymenoptera: Megachilidae) and their evolutionary interpretation.  
242 Russian Entomological Journal 20: 261-264.
- 243 Guiglia D, Pasteels J (1961) Aggiunte ed osservazioni all'elenco delle specie di  
244 imenotteri descritte da Guérin-Méneville che si trovano nelle collezioni  
245 del Museo di Genova. Annali del Museo Civico di Storia Naturale di Genova  
246 72: 17-30.
- 247 Hohmann H, LaRoche F, Ortega G, Barquín J (1993) Bienen, Wespen und Ameisen  
248 der Kanarischen Inseln, Band I. Veröffentlichungen aus dem Übersee-  
249 Museum Bremen, Naturwissenschaften 12: 1-465.
- 250 Lieftinck MA (1958) A preliminary account of the bees of the Canary Islands  
251 (Hym., Apoidea). Commentationes biologicae 18: 1-34.
- 252 Mavromoustakis GA (1953) On the bees (Hymenoptera, Apoidea) of Cyprus, Part  
253 IV. Annals and Magazine of Natural History Series 12, 6: 769-781.doi:  
254 10.1080/00222935308654482.
- 255 Müller A, Bansac N (2004) A specialized pollen-harvesting device in western  
256 palaeartic bees of the genus *Megachile* (Hymenoptera, Apoidea,  
257 Megachilidae). Apidologie 35: 329-337. doi: 10.1051/apido:2004020.
- 258 Ornosá C, Ortiz-Sánchez FJ, Torres F (2007). Catálogo de los Megachilidae del  
259 Mediterráneo Occidental (Hymenoptera, Apoidea). II. Lithurgini y  
260 Megachilini. Graellsia 63: 111-134.
- 261 Özbek H, Zanden G van der (1994) A preliminary review of the Megachilidae of  
262 Turkey, Part IV. Megachilini and Lithurgini (Hymenoptera: Apoidea).  
263 Turkish journal of entomology 18: 157-174.
- 264 Pasteels JJ (1965) Révision des Megachilidae (Hymenoptera Apoidea) de  
265 l'Afrique Noire, 1. Les genres *Creightoniella* [sic], *Chalicodoma* et  
266 *Megachile* (s. str.). Musée Royal de l'Afrique Centrale, Annales Série 8,  
267 Sciences Zoologiques 137, Tervuren, Belgium, 579 pp.
- 268 Schletterer A (1889) Monographie der Bienen-Gattungen *Chelostoma* LATR. und  
269 *Heriades* SPIN. Zoologisches Jahrbuch für Systematik 4: 591-691.
- 270 Schwarz M, Gusenleitner F, Westrich P, Dathe HH (1996) Katalog der Bienen  
271 Österreichs, Deutschlands und der Schweiz (Hymenoptera, Apidae).  
272 Entomofauna Supplement 8, Ansfelden, 398 pp.

- 273 Spinola M (1806) *Insectorum Liguriæ Species Novæ aut Rariores, quas in agro*  
274 *Ligustico nuper detexit, descripsit, et iconibus illustravit*. Vol. 1. Genuæ,  
275 xvii+159 pp.
- 276 Spinola M (1808) *Insectorum Liguriaie Species novae aut rariores quas in agro*  
277 *ligustico nuper deterit*. Vol. 2. Genuae, 262 pp.
- 278 Warncke K (1992) Die westpaläarktischen Arten der Bienengattung *Stelis* Panzer,  
279 1806 (Hymenoptera, Apidae, Megachilinae). Entomofauna 13: 341-376.
- 280 Zanden G van der (1998) Neue paläarktische Arten aus der Familie der  
281 Megachilidae (Insecta, Hymenoptera, Apoidea). Linzer Biologische  
282 Beiträge 30: 523-527.
- 283
